# A Selectable and Excisable Marker System for the Rapid Creation of Recombinant Poxviruses

Julia L. Rintoul<sup>1,2,9</sup>, Jiahu Wang<sup>2,9</sup>, Don B. Gammon<sup>3</sup>, Nicholas J. van Buuren<sup>3</sup>, Kenneth Garson<sup>2</sup>, Karen Jardine<sup>2</sup>, Michele Barry<sup>3</sup>, David H. Evans<sup>3</sup>, John C. Bell<sup>1,2\*</sup>

**1** Department of Biochemistry, Microbiology and Immunology, Faculty of Medicine, University of Ottawa, Ottawa, Canada, **2** Centre for Cancer Therapeutics, Ottawa Hospital Research Institute, Ottawa, Canada, **3** Department of Medical Microbiology and Immunology, Faculty of Medicine and Dentistry, Li Ka Shing Institute of Virology, University of Alberta, Edmonton, Canada

## Abstract

**Background:** Genetic manipulation of poxvirus genomes through attenuation, or insertion of therapeutic genes has led to a number of vector candidates for the treatment of a variety of human diseases. The development of recombinant poxviruses often involves the genomic insertion of a selectable marker for purification and selection purposes. The use of marker genes however inevitably results in a vector that contains unwanted genetic information of no therapeutic value.

**Methodology/Principal Findings:** Here we describe an improved strategy that allows for the creation of marker-free recombinant poxviruses of any species. The Selectable and Excisable Marker (SEM) system incorporates a unique fusion marker gene for the efficient selection of poxvirus recombinants and the Cre/loxP system to facilitate the subsequent removal of the marker. We have defined and characterized this new methodological tool by insertion of a foreign gene into vaccinia virus, with the subsequent removal of the selectable marker. We then analyzed the importance of loxP orientation during Cre recombination, and show that the SEM system can be used to introduce site-specific deletions or inversions into the viral genome. Finally, we demonstrate that the SEM strategy is amenable to other poxviruses, as demonstrated here with the creation of an ectromelia virus recombinant lacking the *EVM002* gene.

**Conclusion/Significance:** The system described here thus provides a faster, simpler and more efficient means to create clinic-ready recombinant poxviruses for therapeutic gene therapy applications.

**Citation:** Rintoul JL, Wang J, Gammon DB, van Buuren NJ, Garson K, et al. (2011) A Selectable and Excisable Marker System for the Rapid Creation of Recombinant Poxviruses. PLoS ONE 6(9): e24643. doi:10.1371/journal.pone.0024643

**Editor:** William P. Halford, Southern Illinois University School of Medicine, United States of America

**Received:** December 23, 2010; **Accepted:** August 16, 2011; **Published:** September 8, 2011

**Copyright:** © 2011 Rintoul et al. This is an open-access article distributed under the terms of the Creative Commons Attribution License, which permits unrestricted use, distribution, and reproduction in any medium, provided the original author and source are credited.

**Funding:** This work was supported by grants from the National Cancer Institute of Canada, Terry Fox Foundation, Natural Sciences Engineering Research Council, and the Canadian Institutes of Health Research to JB, DE and MB. JLR was supported by a CIHR Doctoral award: Frederick Banting and Charles Best Canada Graduate Scholarship. JW was supported by a Lymphoma Research Foundation of Canada Research Fellowship. DBG was supported by a Ralph Steinhauer Award of Distinction from the Province of Alberta. NJVB was supported by a Doctoral NSERC Canada Graduate Scholarship and an Alberta Heritage Foundation for Medical Research Incentive Award. MB holds a Tier I Canada Research Chair, a Howard Hughes International Scholar Award and an Alberta Heritage for Medical Research Senior Scholar award. The funders had no role in the study design, data collection and analysis, decision to publish, or preparation of the manuscript.

**Competing Interests:** The authors have declared that no competing interests exist.

\* E-mail: jbell@ohri.ca

<sup>9</sup> These authors contributed equally to this work.

## Introduction

Poxviruses comprise a large family of double-stranded DNA viruses that infect a wide range of hosts. Vaccinia virus (VV) is the prototypic member of the *Orthopoxvirus* genus and the best-studied virus in the poxvirus family. Since the eradication of smallpox [1], VV and other poxvirus species have continued to be used for the treatment of human disease [2,3] in part because a greater understanding of poxvirus biology has led to safer and more efficacious poxvirus-based therapeutics. The poxvirus genome is easily genetically modified and can accommodate inserts exceeding 25 kb [4] using strategies that are dependent upon virus-encoded homologous recombination [5,6]. Using these approaches, recombinant VV has since proven to be valuable as a vector for gene therapy in a number of therapeutic applications [4,7,8,9,10,11,12,13,14,15]. Similarly, other members of the poxvirus family have also been explored for their potential as viral vectors for therapeutic purposes [9,10,16,17]. Genetically

engineered poxviruses that express immunogens from other infectious agents have shown some promise as novel vaccines against diseases like acquired immunodeficiency syndrome [11], malaria [12], tuberculosis [18], and cancer [7,8,10,13]. As a cancer vaccine, poxviruses have the potential to generate a strong anti-tumoural immune response, especially when genetically modified to express cytokines like IL-2 [14] or cell surface receptors like CD70 that are indicative of oncogenic transformation [15]. Lastly, poxviruses have been successfully engineered as oncolytic agents, offering the advantage of a strong anti-tumoural immune response combined with cancer cell-specific replication [7,16,17,19,20]. A number of these poxvirus candidates have advanced to human clinical trials [10,11,12,13,19], highlighting the therapeutic potential of poxvirus recombinants.

Poxvirus recombinants are typically produced by constructing a plasmid containing the gene(s) of interest flanked by DNA sequences homologous to the desired target locus, followed by transfection of the plasmid into VV infected cells to allow for

recombination of the homologous sequences between the vector and the viral genome [21]. Using traditional approaches, the frequency of recombination is typically less than 0.1% [22], and the isolation of purified recombinant virus is tedious and time-consuming. Recombinant poxviruses are often attenuated, and have reduced growth kinetics and plaque size compared to their wild type counterparts [23]. Historically, the target site of choice has been VV thymidine kinase (Tk), but any non-essential locus can be modified or disrupted in this manner. Recombinants are then isolated and plaque purified. A number of selection methods have been described including selection for Tk-positive or negative phenotypes [21], and resistance to neomycin [24] or mycophenolic acid (MPA) [25]. One can also use plaque assays to identify viruses encoding  $\beta$ -galactosidase [26],  $\beta$ -glucuronidase [27], or fluorescent reporter constructs [28].

Although these methods work well and greatly facilitate the recovery of recombinant viruses, the use of selectable markers inevitably results in the creation of a product that contains genetic information with no therapeutic value. Recombinant poxvirus therapeutics would be considered safer vectors (most notably in the view of regulatory agencies), if the selectable markers were removed from the poxvirus genome [29]. Furthermore, the expression of marker genes from recombinant poxviruses may affect the overall fitness of the virus. Demmin *et al.* have shown that the expression levels of neighboring genes can be affected by the highly active transcription of marker genes incorporated into other large DNA viruses [30].

To facilitate the removal of selectable markers, Falkner and colleagues [31,32] developed transient selection methods wherein a selectable marker is flanked by tandem DNA repeats. The virus is stable while under selection, however the marker is lost through VV dependent homologous recombination once the selection pressure is removed. A similar system was employed by Alejo *et al.*, to create ECTV recombinants [33]. Although these authors describe efficiencies in excess of 90% for removal of the selectable marker, the recombination reaction is a random and lengthy process that relies on poxvirus machinery, and involves more than six rounds of purification. Typically, the efficiency of poxvirus recombination is quite low [22], recombinant viruses are often attenuated and hard to propagate in the presence of wild-type virus [34], and many time-consuming rounds of plaque purification are needed to isolate the desired final viral product. An improved technology is needed that allows for the specific, controlled and efficient removal of selectable markers from recombinant poxvirus genomes.

Here we define a new methodological tool for rapidly producing marker-free recombinant poxviruses. This improved vector development system, which we have termed Selectable and Excisable Marker (SEM), takes advantage of the well-characterized Cre/loxP site-specific recombination system to efficiently excise the reporter gene [35,36]. This strategy avoids the many rounds of passage that are required when using virus recombination systems to excise genes flanked by tandemly duplicated elements [31,32,33]. The SEM system offers the convenience of positive selection of recombinants using both fluorescent and/or drug-based strategies. Since recombinant poxvirus therapeutics are often created with multiple gene knockouts (or knock-ins), the SEM system was designed to be re-usable, therefore eliminating the use of additional reporter genes that would otherwise complicate and lengthen the overall cloning and selection processes. To demonstrate the efficiency and utility of the method, we have applied the SEM strategy to generate viruses with targeted disruptions of different genes using two different poxvirus species. Our results suggest that the SEM vector development

system will not only be useful for the creation of novel poxvirus therapeutics, but also for basic virological studies.

## Results

### Characterization of the components of the SEM system

The Selectable and Excisable Marker system is summarized in **Fig. 1A**. The first generation transfer vector pSEM-1 encoded a foreign gene (firefly luciferase), a selectable marker as a fusion between *yellow fluorescent protein (yfp)* and *guanine phosphoribosyltransferase (gpt)* genes, and loxP sites in the same orientation flanking the selectable marker, with the target insertion site as the VV Tk locus (**Fig. 1B**). To confirm that the expression of YFP was not disrupted from the creation of the YFP-GPT fusion protein, YFP expression was analyzed by western blot from U2OS cells either mock-transfected (lane 1), or transiently transfected with either pEYFP-C1 as a positive control (lane 2) or plasmids containing the *yfp-gpt* fused gene (pEYFP-gpt or pEYFP-gpt-1loxP) in lanes 3 and 4, respectively (**Figure S1A**). The YFP and YFP-GPT fusion proteins have predicted molecular weights of 26 and 45.5 kDa respectively.

The cellular distribution of Cre from Cre recombinase-expressing cell lines was analyzed by immunofluorescence from parental U2OS cells (control), nuclear Cre cells (Nuc-Cre), and cytoplasmic Cre (Cyto-Cre) cells illustrating that the absence of the nuclear localization sequence in the Nuc-Cre cells leads to accumulation of the enzyme in the cytoplasm (**Fig. 1C**). Cre expression levels were compared among mock-transfected U2OS, U2OS cells transiently transfected with pMC-Cre, and both stable cell lines (**Fig. 1D**). In cells that were transiently or stably expressing Cre-recombinase, anti-Cre western blot analysis identified a band at 35 kDa, corresponding to the Cre enzyme. The expression of Cre in the stable cell lines was 2-fold greater when compared to the transiently transfected cells.

### Isolation of a marker-free Tk-deleted, luciferase-expressing VV using the SEM system

(YFP)-based fluorescence activated cell sorting (FACS) was performed on mock infected U2OS cells as a control, and U2OS cells that had been infected with a mixture of parental VV (Wyeth strain), and recombinant VV generated from pSEM-1 expressing the YFP-GPT fusion protein (VV- $\Delta$ Tk-*yfp-gpt*) (**Fig. 2A**). To ensure the highest possible FACS stringency, a cut-off of 0.5% background fluorescence was maintained by comparing the mock-infected U2OS cells to the recombinant YFP-expressing VV infected U2OS cells (235 positive background cells from 47,421 U2OS cells counted, compared to 3004 positive recombinant VV infected cells, from 49,498 U2OS cells counted). These sorted cells were then mixed with uninfected U2OS cells, plated into multi-well dishes, and subjected to two more rounds of YFP<sup>+</sup> plaque purification.

To promote fast and simple removal of the *yfp-gpt* cassette from recombinant viruses generated using the SEM system, viruses were passaged on a U2OS cell line expressing a cytoplasmic form of Cre recombinase. VV- $\Delta$ Tk-*yfp-gpt*-1loxP (control virus) and VV- $\Delta$ Tk-*yfp-gpt* recombinant VV were passaged on either parental U2OS cells, or U2OS cells stably expressing cytoplasmic Cre recombinase (U2OS-Cre) (**Fig. 2B**). The U2OS cells were monitored for both YFP fluorescence and for luciferase-mediated bioluminescence using the IVIS Imager (Xenogen) and Living Image<sup>®</sup> v2.5 software. As shown in the top half of **Fig. 2B**, both VV- $\Delta$ Tk-*yfp-gpt*-1loxP control virus, and VV- $\Delta$ Tk-*yfp-gpt* viruses express luciferase and YFP when used to infect parental U2OS cells. Infection of U2OS-Cre cells by the VV- $\Delta$ Tk-*yfp-gpt*-1loxP and

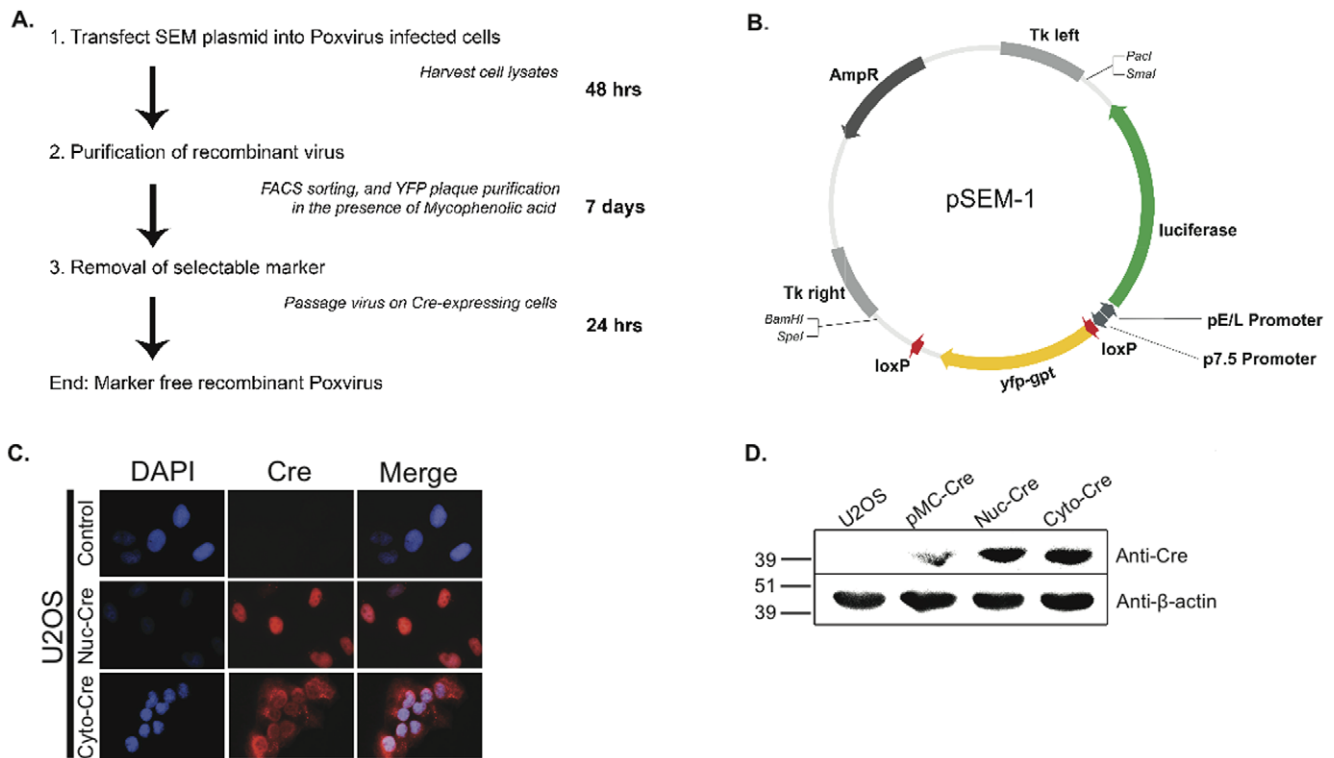

**Figure 1. Overview of the poxvirus Selectable and Excisable Marker cloning system.** (A) Schematic illustrating the Selectable and Excisable Marker poxvirus cloning system. (B) First generation poxvirus cloning vector pSEM-1 with labeled open reading frames. (C) Immunofluorescence detection of Cre recombinase from U2OS cell lines expressing nuclear or cytoplasmic Cre, or control U2OS cells. (D) Western blot analysis of Cre recombinase from U2OS cells mock transfected (U2OS), transiently transfected (pMC-Cre) or stably expressing Cre recombinase targeted to either the nucleus or the cytoplasm (Nuc-Cre and Cyto-Cre respectively). doi:10.1371/journal.pone.0024643.g001

VV- $\Delta$ Tk-*yfp-gpt* viruses led to strong luciferase transgene expression, however expression of YFP is only detectable from cells infected with the VV- $\Delta$ Tk-*yfp-gpt*-1loxP virus. This illustrates the qualitative efficiency by which Cre-expressing U2OS cells excise loxP-flanked markers, as well as the stability of the transgene expression during the recombination reaction. To quantitatively determine the efficiency of the Cre recombination reaction, U2OS cells expressing Cre recombinase were infected with the VV- $\Delta$ Tk-*yfp-gpt* virus. Virus progeny was then analyzed for the percent YFP positive versus negative virus plaques by U2OS plaque assay. As seen in Figure 2C, both cytoplasmic and nuclear Cre expression from stable cell lines resulted in nearly 100% efficiency for marker gene excision, whereas transient transfection of Cre recombinase was only 44% efficient.

The genomic composition of the VV recombinant viruses was analyzed by PCR of viral DNA before and after removal of the *yfp-gpt* cassette. A schematic of the virus genome at the Tk insertion site is shown (Fig. 2D) to illustrate the primer pairs used in the analysis. Primers were designed to amplify regions of DNA at the insertion site (i and iv), surrounding the luciferase transgene (ii), and across the *yfp-gpt* selectable marker (iii). For three of the PCR reactions (primer pairs i, ii, and iv), the amplicons for each of the viruses tested were the same and show that the Cre recombination reaction does not affect the genome structure outside of the 2loxP region (ii), and that the Tk locus was the site of homologous recombination (i, iv) (Fig. 2E). Prior to passage on Cre-expressing cells, PCR using primer pair (iii) of DNA from both VV- $\Delta$ Tk-*yfp-gpt*-1loxP and VV- $\Delta$ Tk-*yfp-gpt* viruses produced bands at 1900 and 2000 bp, respectively. The 100 bp difference can be attributed to

the lack of one loxP site in the VV- $\Delta$ Tk-*yfp-gpt*-1loxP virus. PCR of DNA from the marker-free recombinant VV- $\Delta$ Tk' virus using primer pair (iii), produced a much smaller band due to Cre-mediated deletion of the *yfp-gpt* gene.

### Genomic analysis and confirmation of identity of 3 independent clones of the VV- $\Delta$ Tk-*yfp-gpt* and VV- $\Delta$ Tk' viruses

The genomic composition of the VV- $\Delta$ Tk-*yfp-gpt* and VV- $\Delta$ Tk' viruses was analyzed by restriction enzyme digestion, southern blot hybridization and sequencing analysis at the Cre-recombination site (Fig. 3). Three independent clones of the VV- $\Delta$ Tk-*yfp-gpt* virus were compared to the parental VV Wyeth strain, before and after passage on Cre-expressing cells. The DNA fragment containing the Tk insertion site is highlighted (arrow) in the digest of the parental VV Wyeth virus. Interestingly, the *yfp-gpt* cassette included a HindIII restriction site. This led to a unique DNA digest for the VV- $\Delta$ Tk-*yfp-gpt* clones (Fig. 3A). The DNA fragment containing the Tk insertion site is disrupted in digests of the VV- $\Delta$ Tk-*yfp-gpt* viruses, and is represented by unique bands at ~6000 and ~2800 bp (see arrows, Fig. 3A). Digests of the VV- $\Delta$ Tk' clones resemble the parental VV digest, since the *yfp-gpt* cassette was removed by Cre-recombination. Importantly, the southern hybridization for *yfp* demonstrates that there was only 1 insertion site of *yfp-gpt* during poxvirus homologous recombination (Fig. 3B). DNA sequence analysis of the 3 VV- $\Delta$ Tk' clones was performed to illustrate the consistency of the residual DNA signature following Cre-recombination. A DNASTar sequence alignment of the DNA from each of the 3 VV- $\Delta$ Tk' clones

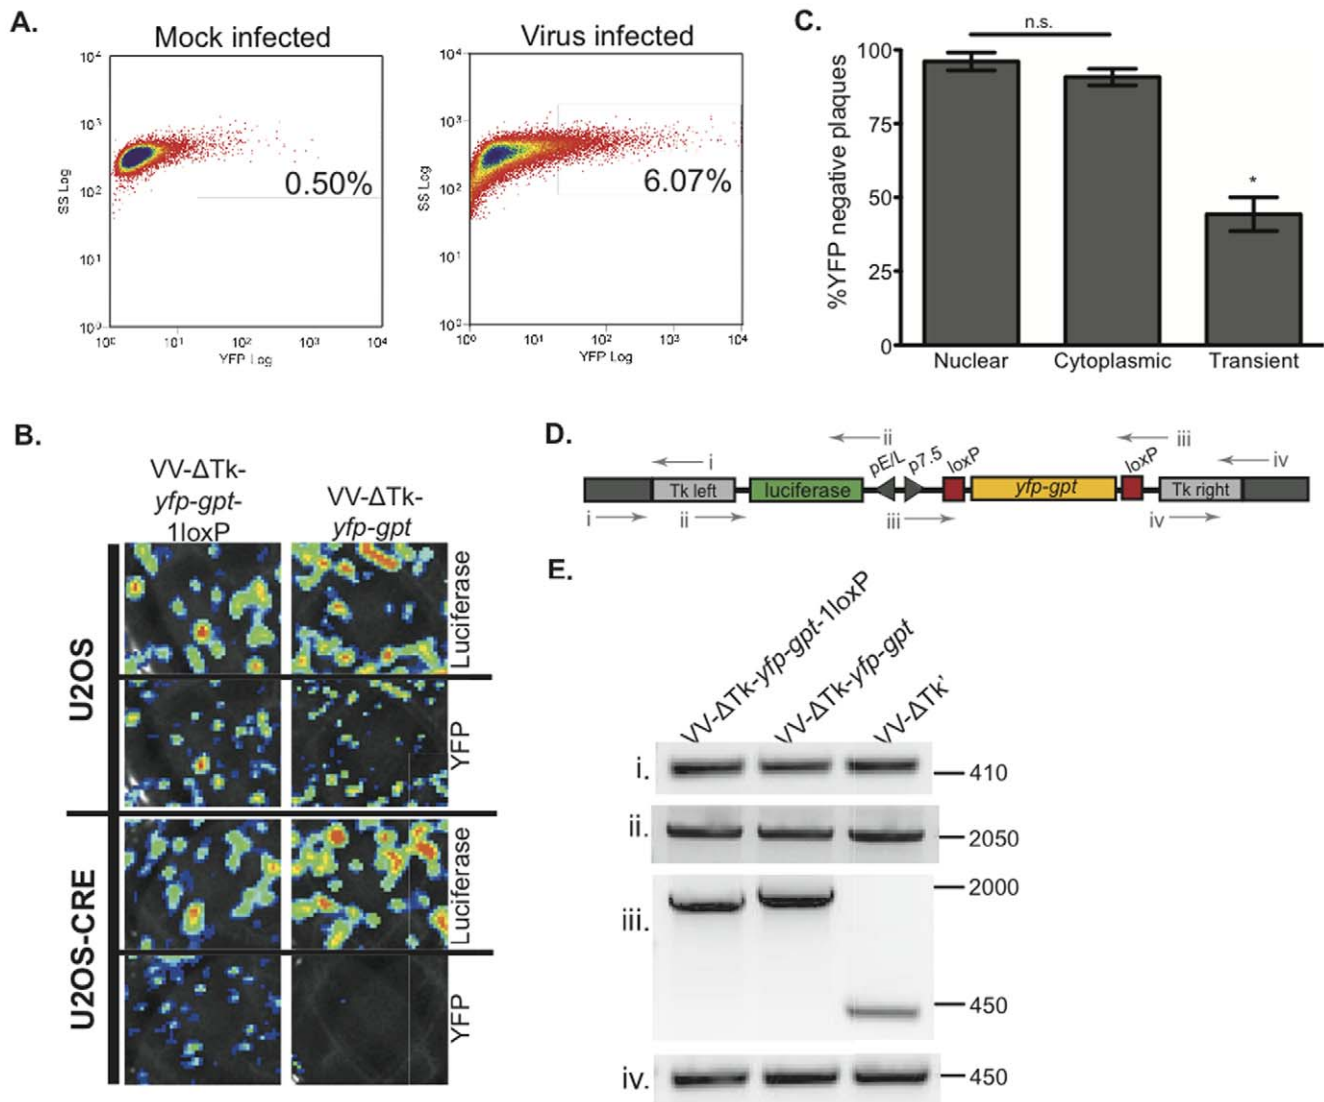

**Figure 2. FACS purification of recombinant VV- $\Delta$ Tk infected cells and Cre-recombinase mediated removal of the selectable marker.** (A) Dot plot of YFP fluorescence versus side scatter from Fluorescence Activated Cell Sorting (FACS) analysis of U2OS cells mock infected, or infected with a mixture of parental VV and recombinant VV virus expressing YFP. (B) Purified recombinant VV- $\Delta$ Tk-*yfp-gpt*-1loxP (control virus) or VV- $\Delta$ Tk-*yfp-gpt* virus were used to infect stable cytoplasmic Cre-expressing cells (U2OS-Cre) or parental U2OS cells in 6-well plates, and were monitored for foreign gene expression (firefly luciferase) and marker gene expression (YFP-GPT fusion protein). (C) Percent YFP-negative VV- $\Delta$ Tk' plaques on U2OS cells after passage of virus on Cre cells (nuclear or cytoplasmic stable cell lines or transiently transfected U2OS cells). (D) Map of the pSEM-1 plasmid indicating the primer pairs used in the PCR reactions to characterize the genome of recombinant VV- $\Delta$ Tk viruses shown in panel E. (E) PCR analysis of DNA extracted from VV- $\Delta$ Tk-*yfp-gpt*-1loxP (control virus), VV- $\Delta$ Tk-*yfp-gpt* and VV- $\Delta$ Tk' viruses. The PCR products span: i. across the left Tk flanking region, ii. across the luciferase gene, iii. across the *yfp-gpt* selectable marker, iv. across the right the Tk flanking region. n.s.=not-significant, \*  $p=0.001$ . doi:10.1371/journal.pone.0024643.g002

revealed a consensus sequence with no conflicts (Fig. 3C). As predicted, the residual DNA signature contained 1 loxP site and remnants from the pSEM-1 vector.

### Construction of the second generation SEM cloning vector and the VV- $\Delta$ I4L viruses

The second generation SEM plasmid, termed pDGloxPKO was designed with multiple cloning sites flanking the *yfp-gpt* cassette. This permits insertion of homologous targeting sequences flanking the selectable marker and/or therapeutic transgene. This vector was also designed such that the *yfp-gpt* cassette and its early/late viral promoter are flanked by loxP sites. To test the importance of

loxP site orientation during Cre-recombination, two pDGloxPKO vectors were created with the loxP sites in either the same orientation (pDGloxPKO<sup>DEL</sup>) (Figure S2A), or oriented towards each other (pDGloxPKO<sup>INV</sup>) (Figure S2B). Inserting homologous sequences of DNA from the VV genome flanking the *I4L* gene (I3L and I5L homology) into both pDGloxPKO<sup>DEL</sup> and pDGloxPKO<sup>INV</sup> vectors generated pDGloxPKO<sup>DEL</sup>- $\Delta$ I4L and pDGloxPKO<sup>INV</sup>- $\Delta$ I4L, respectively (Fig. 4A and 4B). These vectors were used to create two strains of recombinant VV in which the *I4L* locus is disrupted by vector-derived *yfp-gpt* cassette sequences (see schematic in Fig. 4C). Using vector pDGloxPKO<sup>DEL</sup>- $\Delta$ I4L, which contains identically oriented loxP sites flanking the

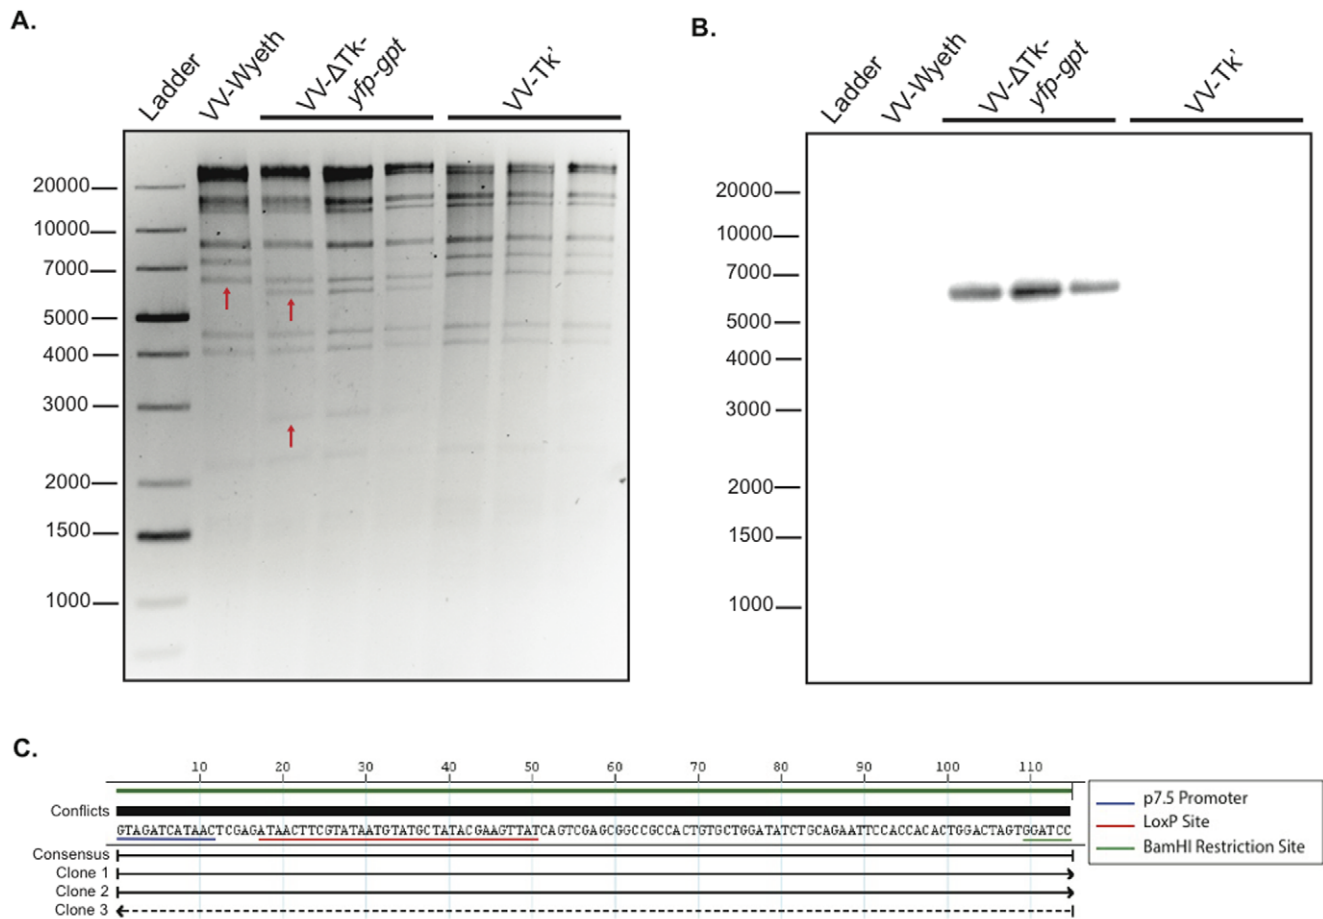

**Figure 3. Confirmation of genomic composition of 3 independent recombinant VV-ΔTk viruses.** (A) An ethidium bromide stained DNA gel of genomic HindIII restriction digests of viral DNA isolated from parental VV (Wyeth Strain), 3 clones of VV-ΔTk-*yfp-gpt* and 3 clones of VV-ΔTk'. Arrows indicate the Tk insertion site (VV-Wyeth), and the unique bands that result from insertion of the *yfp-gpt* cassette (VV-ΔTk-*yfp-gpt*). (B) Southern hybridization of the DNA gel in A identifying the *yfp* insert present in the genome of the VV-ΔTk-*yfp-gpt* clones, but not in parental VV-Wyeth or the VV-ΔTk' clones. (C) DNASTar sequence alignment at the *yfp-gpt* insertion site of DNA isolated from the 3 VV-ΔTk' clones post Cre passage. doi:10.1371/journal.pone.0024643.g003

*yfp-gpt* cassette led to the generation of strain VV-ΔI4L<sup>DEL</sup>, whereas using vector pDGloxPKO<sup>INV</sup>-ΔI4L in which the inserted *yfp-gpt* cassette is flanked by loxP sites oriented towards each other generated virus VV-ΔI4L<sup>INV</sup>. The genomic composition of the VV-ΔI4L<sup>DEL</sup> virus post Cre passage was analyzed by sequencing at the excision site of *yfp-gpt* and revealed the Cre/loxP signature remaining in the viral genome post Cre-recombination (Fig. 4D). As expected, the virus contains 1 loxP site, and remnants from the pDGloxPKO vector. To exclude the possibility that there were multiple *yfp-gpt* insertion sites, the entire genome of VV-ΔI4L<sup>DEL</sup> virus post Cre passage was sequenced. The sequence of the VV-ΔI4L<sup>DEL</sup> recombinant was compared to the sequence of the parental VV (Western Reserve) using a dotplot analysis (Figure S3A). These data illustrate that the VV-ΔI4L<sup>DEL</sup> virus is disrupted only at the *I4L* locus, thereby confirming 1 insertion site at the desired locus.

#### Cre-mediated recombination of viral DNA is dependent upon loxP site orientation

Both the pDGloxPKO<sup>DEL</sup> and pDGloxPKO<sup>INV</sup> plasmids were used to explore the dependence of loxP orientation on Cre-mediated recombination of poxvirus genomes. Previous work has shown that Cre-mediated recombination between identically-oriented loxP sites

generates deletions while oppositely oriented loxP sites lead to inversion of DNA sequences [35,36], but it remained to be formally proven that this would also hold-true in virus-infected cells. Recombinant ΔI4L viruses were analyzed by PCR for the presence of the *I4L* gene before (BSC-40 passage) and after (U2OS-Cre passage) Cre recombination (Fig. 5A). As an additional test of the SEM approach, we have included *F4L*-inactivated recombinants in these experiments, as ΔF4L virus backgrounds have been reported to have severe growth kinetics compared to their wild-type counterpart [23]. Referring to the expected amplicon sizes and primer pairs illustrated in Fig. 4C, the PCR products generated using primers flanking the *yfp-gpt* cassette (A+D) exhibited sizes indicative of replacement of the *I4L* gene with the *yfp-gpt* cassette in viruses cultured in BSC-40 cells (Fig. 5A, left panel). Upon passage in Cre-expressing cells, only those viruses produced using pDGloxPKO<sup>DEL</sup> vectors (ΔI4L<sup>DEL</sup>, and ΔI4L/ΔF4L<sup>DEL</sup>) exhibited the deletion of the *yfp-gpt* cassette (Fig. 5A, right panel). This shows that Cre-mediated deletions only occur when the DNA is flanked by identically oriented loxP sites.

The orientation of the *yfp-gpt* cassette in recombinant viruses produced using the pDGloxPKO<sup>INV</sup>-ΔI4L vector were also analyzed by PCR before and after passage through Cre-expressing cells. We used primer pairs designed to amplify the *yfp-gpt* cassette

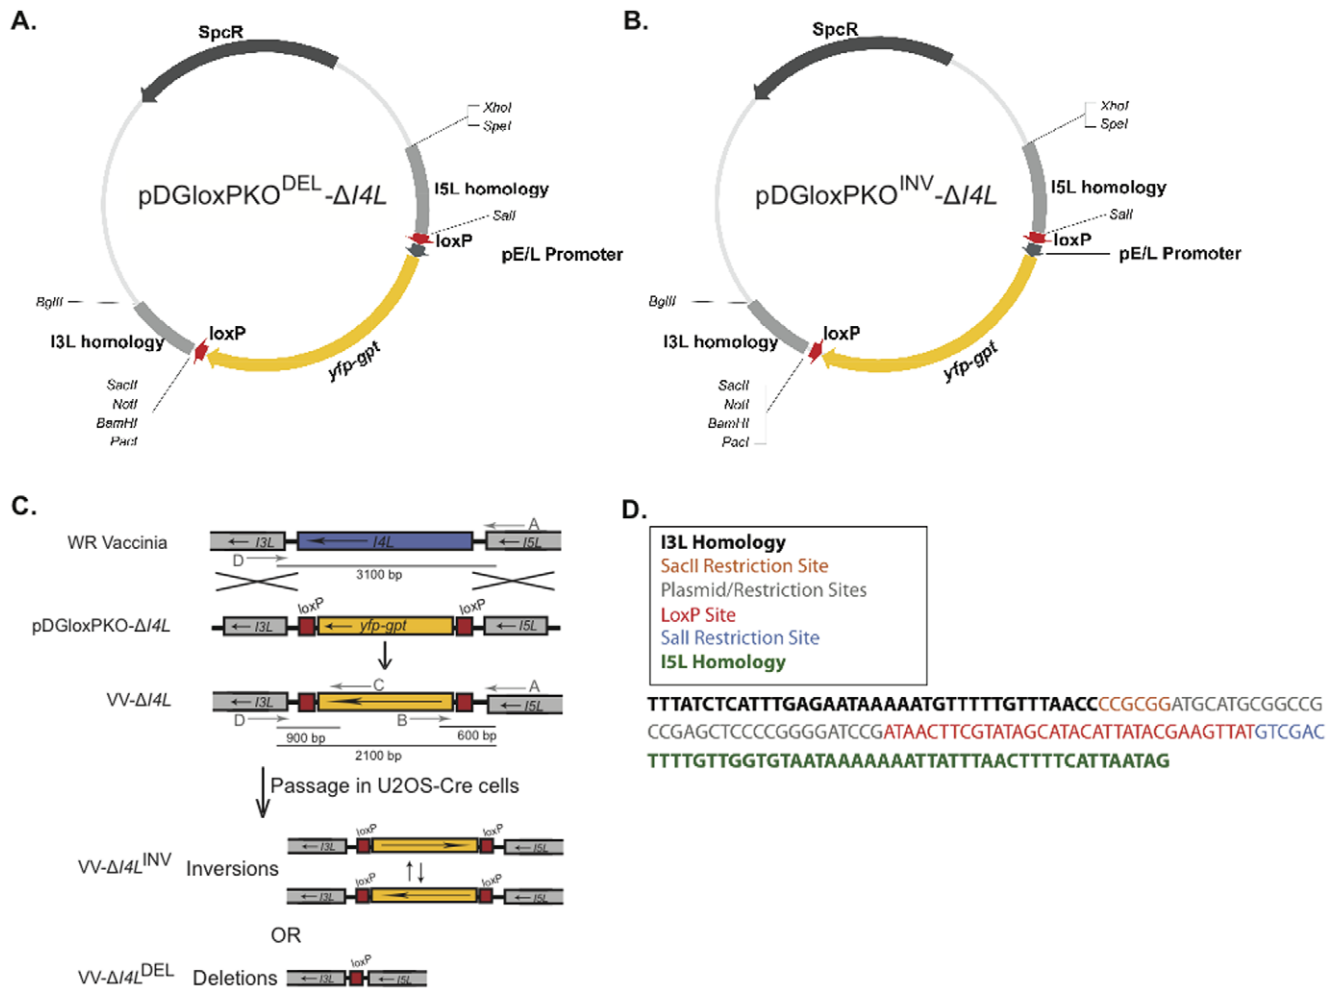

**Figure 4. Creation of the VV- $\Delta I4L$  mutants from the second generation SEM cloning vectors.** (A) Map of cloning vector pDGloxPKO<sup>DEL</sup>- $\Delta I4L$  and (B) pDGloxPKO<sup>INV</sup>- $\Delta I4L$  with labeled open reading frames. (C) Schematic displaying the strategy for knock-out of the *I4L* open reading frame from VV strain WR, and possible outcomes of Cre-recombination of recombinant VV- $\Delta I4L$  virus generated from either the pDGloxPKO<sup>DEL</sup>- $\Delta I4L$  or pDGloxPKO<sup>INV</sup>- $\Delta I4L$  vectors. (D) DNA sequence analysis of the VV- $\Delta I4L$ <sup>DEL</sup> virus post Cre passage. doi:10.1371/journal.pone.0024643.g004

in the forward orientation (pairs A+B, C+D), and also in the case of *yfp-gpt* inversions (pairs A+C, B+D). The viruses isolated from BSC-40 cells produced PCR products consistent with a single orientation identical to that seen in original plasmid (Fig. 5B, left panel). However, upon passage through Cre-expressing cells, the PCR products displayed a pattern characteristic of a mix of two different arrangements of loxP flanked inserts (Fig. 5B, right panel).

Western blot analysis was used to confirm deletion of the *I4L* locus of all  $\Delta I4L$  strains. Recombinant  $\Delta I4L$  viruses produced with either pDGloxPKO<sup>INV</sup>- $\Delta I4L$  or pDGloxPKO<sup>DEL</sup>- $\Delta I4L$  vectors led to inactivation of I4 protein expression and this inactivation was specific since I3, (expressed from the neighbouring gene, *I3L*) levels remained unchanged (Fig. 5C). The YFP-GPT protein was only deleted from strains that had been generated with the pDGloxPKO<sup>DEL</sup>- $\Delta I4L$  targeting vector and passed in Cre-expressing cells (Fig. 5C, right panel), further confirming that deletion events need both identically-oriented loxP sites and exposure to Cre activity. Collectively, these results demonstrate that the SEM vector system can be used to either delete or invert sequences within the viral genome, upon passage of the selected strains in Cre-expressing cells.

### The SEM system can be used with other members of the Poxvirus family

The SEM system was also used to create a recombinant ECTV (strain Moscow) lacking the *EVM002* gene using the transfer plasmid pDGloxPKO<sup>DEL</sup>- $\Delta EVM002$  (Fig. 6A). Referring to the schematic outlined in Fig. 6B, ECTV viral recombination with pDGloxPKO<sup>DEL</sup>- $\Delta EVM002$  with subsequent MPA drug selection created the primary recombinant ECTV- $\Delta EVM002$ -*yfp-gpt*. The virus was passed through U2OS-Cre cells to obtain the marker-free recombinant virus ECTV- $\Delta EVM002$ . The genomic composition of wild type ECTV (ECTV-wt), ECTV- $\Delta EVM002$ -*yfp-gpt*, and ECTV- $\Delta EVM002$  viruses was confirmed by PCR analysis (Fig. 6C). These PCR analyses demonstrate at the genomic level the deletion of the *EVM002* gene, the insertion of the *yfp-gpt* cassette, and its subsequent removal following Cre-mediated recombination. The genomic composition of the ECTV- $\Delta EVM002$  was analyzed by sequencing at the excision site of *yfp-gpt* to illustrate the Cre/loxP signature remaining in the viral genome post recombination (Fig. 6D). As expected, the virus contains 1 loxP site, and remnants from the pDGloxPKO vector. YFP protein expression from the ECTV viruses was also analyzed by confocal microscopy (Fig. 6E). Mock-infected BGMK cells

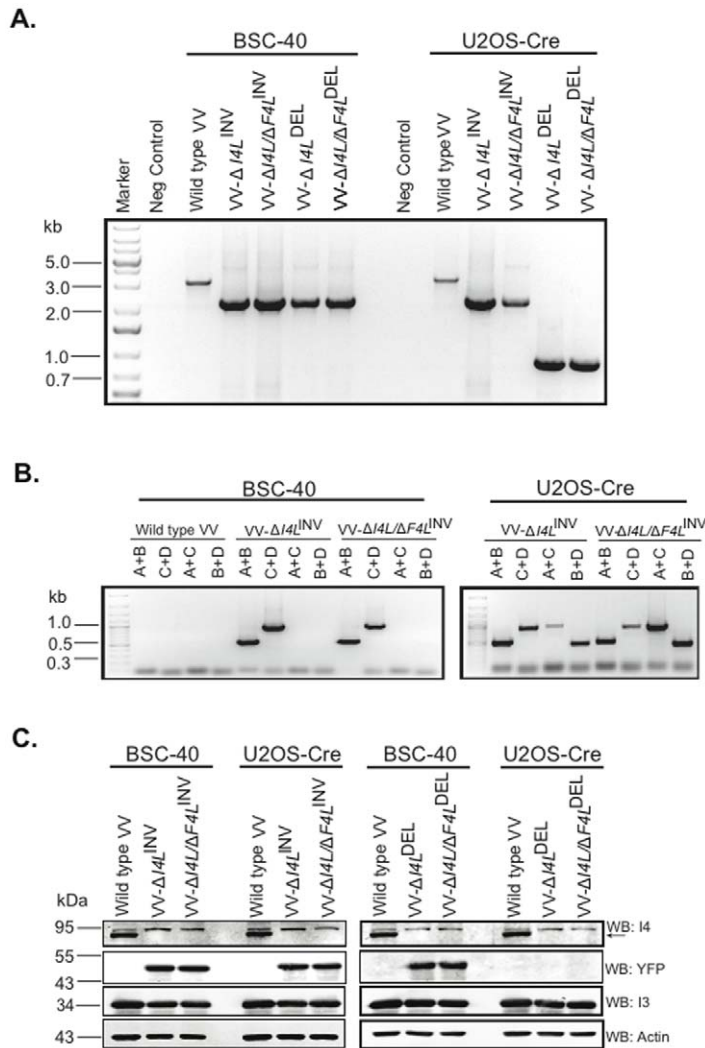

**Figure 5. Cre-mediated recombination of vaccinia virus DNA is dependent upon loxP site orientation.** (A) PCR analysis of the *I4L* locus using primers flanking the *yfp-gpt* cassette of two purified  $\Delta I4L$  strains generated from either the pDGloxPKO<sup>DEL</sup>- $\Delta I4L$  or pDGloxPKO<sup>INV</sup>- $\Delta I4L$  vectors before (BSC-40) and after (U2OS-Cre) Cre-recombination. (B) PCR analysis of two purified  $\Delta I4L$  strains generated from the pDGloxPKO<sup>INV</sup>- $\Delta I4L$  vector with primers amplifying inside and outside the *yfp-gpt* cassette before (BSC-40) and after (U2OS-Cre) Cre-recombination. (C) Western blot analysis of two purified  $\Delta I4L$  strains generated from either the pDGloxPKO<sup>DEL</sup>- $\Delta I4L$  or pDGloxPKO<sup>INV</sup>- $\Delta I4L$  vectors for I4, YFP, I3 (positive control for infection) and actin before (BSC-40) and after (U2OS-Cre) Cre-recombination. doi:10.1371/journal.pone.0024643.g005

were compared to ECTV-wt, ECTV- $\Delta EVM002$ -*yfp-gpt*, and ECTV- $\Delta EVM002$  infected cells for YFP fluorescence. Only those cells that were infected with recombinant ECTV- $\Delta EVM002$ -*yfp-gpt* expressed detectable levels of YFP fluorescence.

## Discussion

Poxviruses have been, and will continue to be, important therapeutics for the prevention and treatment of human diseases [2,3,10,11,12,13,19]. Arguably, the application of VV for the eradication of smallpox has been one of the most important medical advances in human history. A variety of poxvirus based vaccine vectors have been developed for both human and veterinary infectious diseases and more recently as agents for the treatment of cancer [2,7,8,10,13,14,15,16,17,19,20]. During therapeutic development it is desirable to use marker genes for both construction of novel vectors but also for pre-clinical and even early phase clinical experimentation. Unfortunately as

products mature, there becomes a transition point where marker genes are no longer necessary and, in the view of regulatory agencies, may even compromise the safety of the vector [29].

The SEM system provides a faster, simplified and more efficient means to create marker-free recombinant poxviruses [31,32,35]. As outlined in **Fig. 1A**, the SEM cloning strategy can be summarized in three basic steps: transfection of poxvirus-infected cells with an SEM vector, purification of resulting recombinants through FACS and/or drug selection, and finally removal of the selectable marker by virus passage in Cre-expressing cells. The first generation pSEM-1 vector (**Fig. 1B**) was created to demonstrate the “proof of principle” that it was possible to create marker-free recombinant poxviruses with our system, while stably retaining a functional transgene (in our case luciferase) during the Cre-recombination reaction (**Fig. 2B**). The second generation SEM plasmids (**Figure S2**) broaden the applicability of the SEM system to other poxvirus loci, and other poxvirus genera by the insertion of two multiple cloning sites (MCS) flanking the *yfp-gpt* cassette and loxP sites. Sequences homologous to

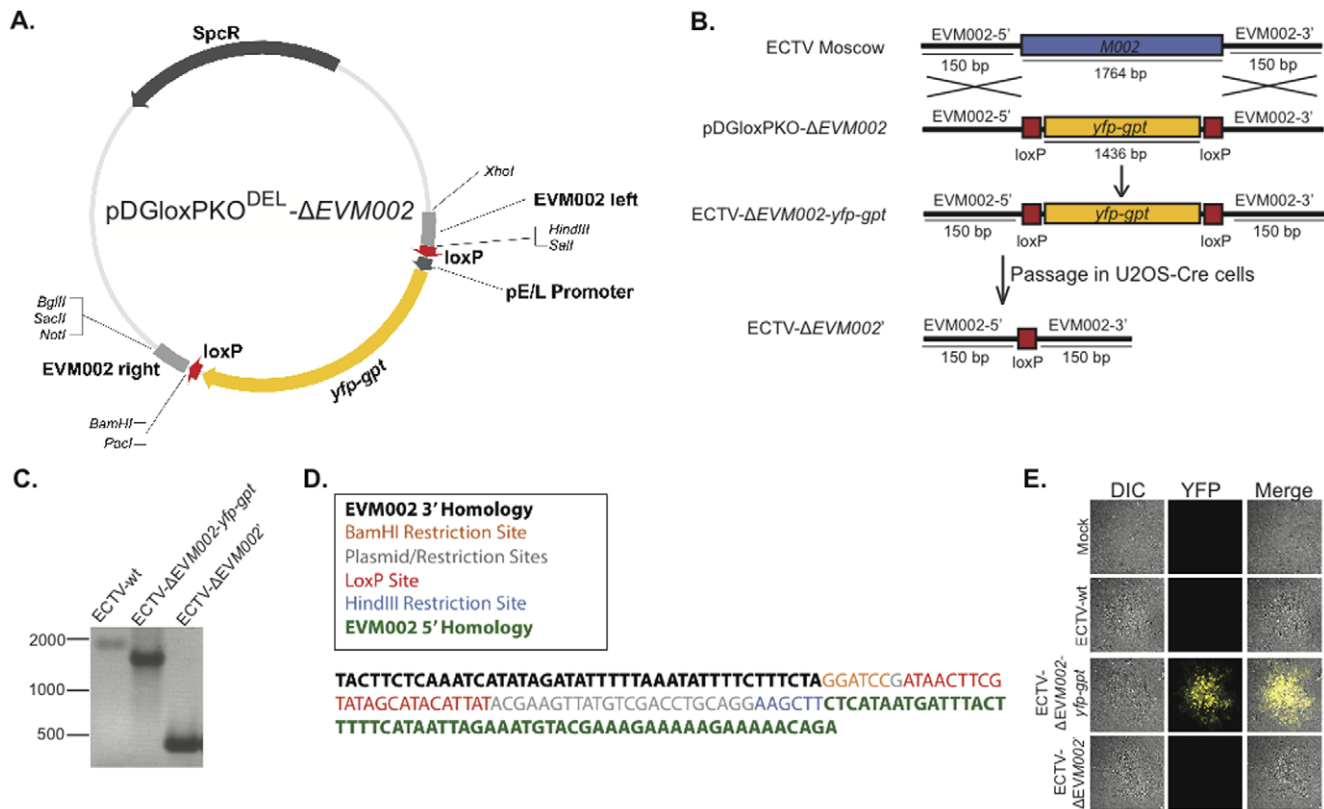

**Figure 6. Generation of a recombinant ECTV using SEM.** (A) Map of pDGloxPKO<sup>DEL</sup>-ΔEVM002 with labeled open reading frames. (B) Schematic displaying the strategy for knock-out of the *EVM002* open reading frame from ECTV. (C) PCR analysis of viral DNA. Primers were used to amplify the regions of pDGloxPKO-ΔEVM002 homology from wild-type ECTV (ECTV-wt), ECTV-ΔEVM002-*yfp-gpt*, and ECTV-ΔEVM002'. (D) DNA sequence analysis of the ECTV-ΔEVM002' virus (post Cre passage). (E) Confocal microscopy was used to detect YFP fluorescence in mock infected BGMC cells or BGMC cells infected with ECTV-wt, ECTV-ΔEVM002-*yfp-gpt*, or ECTV-ΔEVM002'. A 40× magnification lens was used to detect differential interference contrast (DIC), and YFP fluorescence.

doi:10.1371/journal.pone.0024643.g006

any poxvirus gene can be added to the pDGloxPKO vector, as we have demonstrated with the ectromelia virus recombinant constructed from pDGloxPKO<sup>DEL</sup>-ΔEVM002 (Fig. 6).

The most labour-intensive part of traditional poxvirus cloning strategies is the isolation and purification of desired recombinants from a heterogeneous population. To simplify the isolation of pure recombinant poxvirus clones, we have included both drug (*gpt*) and optical (*yfp*) selection strategies in the SEM system. The flexibility and simplicity of this approach ensures that the SEM system will be amenable to any research laboratory. MPA drug selection is relatively inexpensive and historically has shown to be an efficient means to purify poxvirus recombinants [25]. Indeed, we have shown here that MPA selection alone is sufficient to isolate a pure recombinant poxvirus population in as few as three passages (e.g. VV-ΔI4L, Fig. 4 and ECTV-ΔEVM002, Fig. 6). We have also shown the usefulness of fluorescent sorting strategies to rapidly enrich for the recombinant virus population by subjecting the initial transfection/infection reaction to FACS analysis (Fig. 2A). Alternatively, a more traditional approach of using fluorescent microscopy to identify and pick individual plaques expressing YFP can be used. The flexibility of the SEM system in the purification of recombinant poxviruses is particularly important when working with highly attenuated strains. Importantly, we show here that even the double deleted ΔI4L/ΔF4L VV strains, which have severe replication defects and exhibit a small plaque phenotype [23], can be produced and purified using the SEM system.

We had hypothesized that expression of cytoplasmic Cre-recombinase would maximize recombination efficiency since poxviruses replicate in the cytoplasm. Indeed a single passage of the VV-ΔTk-*yfp-gpt* virus on U2OS cells expressing cytoplasmic Cre is sufficient to eliminate nearly all of the *yfp-gpt* cassette from the viral genome (Fig. 2B and 2C). However, infection of U2OS cells stably expressing nuclear Cre still led to nearly 100% recombination efficiency (Fig. 2C). Not unlike other proteins, the Cre enzyme is initially located in the cytoplasm prior to transport to the nucleus. We speculate that in cells selected for high levels of Cre expression, the amount of enzyme is not limiting for the excision reaction and thus even small amounts, or temporary cytoplasmic expression of Cre from nuclear-cre expressing cells may be sufficient to facilitate recombination. Importantly, despite lower Cre-expression levels achieved from transient transfection of U2OS cells with pMC-Cre (Fig. 1D), the recombination frequency was still >40% (Fig. 2C). These data illustrate how the SEM system can be used with any transfectable cell line while maintaining the efficiency of the Cre/loxP reaction.

To confirm that the residual DNA signature was consistent for all recombinant viruses post Cre recombination, DNA sequencing was performed at the insertion site (Figs. 3C, 4D, 6D). In all cases, one 34 base pair loxP site remains in the viral genome, with some remnants of the respective SEM cloning vectors. We have observed no obvious impact of retention of this 34 base pair sequence on virus replication and indeed this has been studied



extensively in mammalian systems where the retention of loxP sequences has no impact on mRNA stability, promoter activity or genome integrity [37,38]. To further validate the consistency of the recombination events of the SEM system, 3 clones of the VV- $\Delta$ Tk virus pre (VV- $\Delta$ Tk-*yfp-gbt*) and post (VV- $\Delta$ Tk) Cre passage were analyzed by HindIII DNA restriction digest and southern hybridization (Fig. 3). As predicted, the DNA signatures are consistent, and the Tk locus is the only site of poxvirus recombination. Since the VV- $\Delta$ I4L and ECTV- $\Delta$ EVM002' recombinant viruses were purified as heterogeneous populations (MPA drug selection), the sequence analysis is representative of all recombination events. To confirm that there was only 1 site of *yfp-gbt* integration in the VV- $\Delta$ I4L<sup>DEL</sup> virus, the entire genome of the virus was sequenced. A dotplot comparison of recombinant VV- $\Delta$ I4L<sup>DEL</sup> to parental VV illustrates that the recombination event was targeted to the I4L locus (Figure S3).

Using the second generation SEM cloning vectors (pDGloxPKO<sup>DEL</sup> and pDGloxPKO<sup>INV</sup>), we have shown for the first time that similar to recombination of cellular DNA [35,36], Cre-mediated recombination between identically-oriented loxP sites generates deletions, while oppositely oriented loxP sites leads to inversions of viral DNA sequences (Fig. 5). Interestingly, targeted inversions of the *yfp-gbt* cassette when generating viruses using the pDGloxPKO<sup>INV</sup>- $\Delta$ I4L targeting vector identified an additional application for the SEM system. Site-specific inversions may be useful for transcriptional interference studies [39] in which a poxvirus promoter could drive the same mRNA from opposite strands. This approach would allow one to assess the potential strand-specific influence of neighbouring transcriptional processes and read-through transcripts on the efficiency of transcription of the reporter mRNA.

In summary, the SEM strategy provides an efficient means to “surgically” manipulate viral genomes by adding or deleting genes without leaving unwanted marker genes behind. We have demonstrated the applicability of the SEM system to create recombinant viruses in two different species, targeting three different poxvirus loci by deletions and/or insertions, including strains with severe replication defects. By inclusion of fluorescence and drug selection strategies, the SEM system offers both flexibility and simplicity for the purification of recombinant viruses. The *yfp-gbt* cassette was also shown to be useful during Cre-recombination to monitor efficiency, which could be enhanced even further by making use of a reverse *gbt* selection strategy [40]. This system will be especially useful when multiple deletions or transgenes are to be added sequentially to a single vector. Finally, the tools developed in the SEM system may also contribute to basic virology research, like those that involve transcriptional interference studies.

## Materials and Methods

### Antibodies and reagents

The following primary antibodies were used: rabbit anti-GFP/YFP (Abcam), Cre (Novagen), VV I4 (a gift from Dr. C. Mathews, Oregon State University), mouse anti- $\beta$ -actin (Sigma-Aldrich) and VV I3 [41]. Secondary antibodies conjugated to horseradish peroxidase (BioRad) or infrared dyes (Li-Cor) were used to detect primary antibodies in immunoblotting. OptiMEM (Invitrogen) was used for transfection experiments.

### Cells

The following cells were purchased from American Type Tissue Collection: human osteosarcoma (U2OS), human embryonic kidney, large T antigen transformed (293T), and green monkey kidney (BSC-40) cells. Buffalo green monkey kidney (BGMK) cells

were purchased from Diagnostic Hybrid. Cell lines were maintained in Dulbecco's modified Eagle's medium (Hyclone) supplemented with 10% fetal calf serum (Cansera), penicillin (100 U/ml), and streptomycin sulfate (100  $\mu$ g/ml) at 37°C in 5% CO<sub>2</sub>. All cell lines were tested and found clear of mycoplasma contamination.

### Plasmids

Plasmids pEYFP-C1, pLPCX, and pLXSN were purchased from Clontech and pGEM-T was purchased from Promega. Plasmid pMC-Cre [42] was a gift from Dr. Klaus Rajewsky (Harvard Medical School), pSEL-eGFP [20] and pSC65-luc [43] were gifts from Dr. David Bartlett (University of Pittsburgh) and pHIT60 and pHIT456 were gifts from Dr. Ian Lorimer (University of Ottawa).

### Cloning – pSEM-1 vector

The *gbt* gene was first excised from pSEL-eGFP with *BseY1*, repaired, and ligated into a pT7blue-3 cloning vector (Novagen). The *gbt* gene was then excised with *SaI* and *Bam*HI and ligated, in frame, into *Xho*I/*Bam*HI cut pEYFP-C1. This created pEYFP-gpt bearing a fusion of the two polypeptides. The first loxP sequence was constructed by annealing together two oligonucleotides with the same sequence (loxP, Table S1), using the In-Fusion-2 method (Clontech) [44]. The pEYFP-gpt plasmid was then cut with *Nhe*I and recombined with the double-stranded DNA loxP site to obtain ploxP-EYFP-gpt. The second loxP sequence was inserted in a similar way by cutting ploxP-EYFP-gpt at the *Bam*HI site, and inserting the double-stranded oligonucleotide loxP (Table S1). The resulting plasmid, p2loxP-EYFP-gpt, contained two loxP sites with the same orientation flanking the gene encoding the YFP-GPT fusion protein.

The pSEM-1 plasmid was assembled by inserting the loxP-*yfp-gbt*-loxP cassette into pSC65-luc. This was accomplished by cutting p2loxP-EYFP-gpt and pSC65-luc plasmids with *Xho*I and *Bam*HI restriction enzymes, and ligating the loxP-*yfp-gbt*-loxP insert into the VV Tk gene in pSC65-luc. Two vectors were created: a negative control vector containing only the first loxP site (pSEM-1ctrl), and a vector containing two loxP sites inserted in the same orientation and flanking the reporter construct (pSEM-1) (Fig. 1B).

### Cloning – pDGloxPKO vectors

A second series of vectors were assembled using gene synthesis (GeneArt) and contained two multiple cloning sites flanking the loxP sites. To test the importance of loxP orientation, two versions of these plasmids were created with the loxP sites either in the same (pDGloxPKO<sup>DEL</sup>) or in the opposite orientation (pDGloxPKO<sup>INV</sup>) with respect to one another (Figure S2).

### Cloning – pDGloxPKO- $\Delta$ I4L vectors

The PCR and primers I5L (left) plus I5L (right) (Table S1) were used to prepare a ~430 bp PCR product encoding sequences flanking the “I5L” side of the VV I4L locus. Similarly the PCR and primers I3L (left) plus I3L (right) (Table S1) were used to produce a ~340 bp PCR product containing sequences flanking the “I3L” side of the I4L locus. These DNAs were then cloned into the *Spe*I/*Sa*I (I5L homology) and *Sac*II/*Bg*III (I3L homology) restriction sites of pDGloxPKO<sup>INV</sup> and pDGloxPKO<sup>DEL</sup>. Adding these sequences created vectors pDGloxPKO<sup>INV</sup>- $\Delta$ I4L and pDGloxPKO<sup>DEL</sup>- $\Delta$ I4L (Fig. 4).

### Cloning – pDGloxPKODEL- $\Delta$ EVM002 vector

The PCR and primers EVM002-5' (left) plus EVM002-5' (right) (Table S1) were used to prepare a 150 bp product

encoding sequences to the left of the *EVM002* gene. Similarly the PCR and primers EVM002-3' (left) plus EVM002-3' (right) (**Table S1**) were used to produce a 150 bp product encoding sequences to the right of the *EVM002* gene in the ectromelia virus (ECTV) genome. These two 150 bp PCR fragments were cloned into pGEM-T vectors (Promega). The fragment encoding sequences located on the left side of the *EVM002* gene was subsequently cloned into the pDGloxPKO<sup>DEL</sup> vector using the *XhoI* and *HindIII* restriction sites to create pDGloxPKO-*EVM002*-5'. Finally, the EVM002-3' 150 bp was cloned into pDGloxPKO-*EVM002*-5' using the *BamHI* and *NoI* restriction sites to create pDGloxPKO<sup>DEL</sup>-*ΔEVM002*.

### Cloning – Cre plasmids

The gene encoding a form of Cre protein lacking a nuclear localization sequence (NLS) was PCR amplified from pMC-Cre using Taq polymerase and primers NLS-free Cre (left) and NLS-free Cre (right) (**Table S1**). The PCR product was digested with *XhoI* and *NoI* and ligated into pLPCX cut with the same enzymes. This produced plasmid pLPCX-Cyto\_Cre. A Cre plasmid was also created with the NLS intact by digesting Cre from pMC-Cre, and inserting the gene into the *XhoI* site of the pLXSN vector to form pLXSN-Nuc\_Cre.

### U2OS-Cre cells

Retroviral transduction methods were used to produce cells expressing nuclear- or cytoplasmic-localized Cre protein. A stock of transducing particles was first produced by using calcium phosphate to co-transfect 293T cells with 7 µg of plasmid DNA (either pLPCX-Cyto\_Cre or pLXSN-Nuc\_Cre) along with the retroviral helper plasmids pHIT60 and pHIT456 [45]. Virus-containing supernatants were harvested two days later and the debris removed with a 0.45-µm filter. To perform the transduction experiment,  $2.5 \times 10^5$  U2OS cells were infected with 2 mL of the virus for 2 hr in the presence of 8 µg/mL of polybrene. Two days later, G418 (800 µg/mL) or puromycin (1 µg/mL) were added and drug-resistant recombinants were harvested a week later. Purified recombinant poxviruses were passaged 1-to-3 times in these cells to remove loxP-flanked genes.

### Recombinant viruses

Viruses constructed from the pSEM-1 vector were produced from the VV strain Wyeth [7]. U2OS cells were infected with VV at a multiplicity of infection (MOI) of 0.01 and then transfected with plasmid pSEM-1 or pSEM-1ctrl vectors using Lipofectamine 2000 (Invitrogen). The cells were incubated at 37°C for 4 hr, the medium was replaced, and then the cells cultured for two more days. The dishes were harvested, YFP-positive cells sorted using flow cytometry, and the YFP-positive population purified further by selecting YFP-positive plaques in the presence of MPA for 2 rounds of purification. This produced VV strain VV- $\Delta$ Tk-*yfp-gpt* with both loxP sites in the same orientation and VV strain VV- $\Delta$ Tk-*yfp-gpt*-1loxP bearing a single loxP site.

Viruses bearing deletions of the *I4L* gene were produced using pDGloxPKO<sup>INV</sup>- $\Delta$ I4L and pDGloxPKO<sup>DEL</sup>- $\Delta$ I4L vectors in VV strain Western Reserve (WR), and in  $\Delta$ F4L VV strains [23]. BSC-40 cells were infected for 1 hr (MOI = 2), transfected with plasmid DNA using Lipofectamine 2000, and virus harvested two days later. Recombinant virus were isolated using three rounds of plaque purification on BSC-40 cells in MPA selection media (DMEM supplemented with 10% serum, 50 U/mL penicillin, 50 µg/mL of streptomycin, 200 µM glutamine, 250 µg/mL xanthine, 15 µg/mL hypoxanthine, and 25 µg/mL MPA).

A recombinant ECTV was constructed by infecting BGMK cells with ECTV (strain Moscow) at an MOI = 0.01, followed by transfection with *XhoI* and *NoI* linearized pDGloxPKO- $\Delta$ EVM002 DNA. The virus was harvested two days later and foci were purified twice in the presence of MPA and twice in the absence of MPA selection.

### Cell sorting and flow cytometry

U2OS cells were infected with virus at MOI ~0.1 for 6 hr, and sorted for YFP fluorescence on a MoFlo cytometer (DakoCytomation). The top 5% of YFP positive cells (approximately 3,000 cells) were collected and mixed with ~300,000 uninfected U2OS cells and cultured for two days in a 10 cm dish. For flow cytometry,  $\sim 10^6$  HeLa cells were infected with virus at a MOI = 3 for 4 hr. The cells were suspended in 0.5 mL of PBS containing 1% FBS, and YFP fluorescence determined using a FACScan flow cytometer (Becton-Dickinson) and CellQuest software (Version 3.1).

### Luciferase and fluorescence detection using IVIS Imager

The fluorescence and bioluminescence were detected using a 200 Series IVIS Imager (Xenogen) and Living Image<sup>®</sup> v2.5 software. Cell lysates from Cre cell lines infected with VV- $\Delta$ Tk-*yfp-gpt* were used to infect U2OS cells which were first imaged for YFP fluorescence prior to incubation with 20 µg of D-luciferin (Molecular Imaging Products Company) added directly to the cultured cells. D-luciferin was incubated with the cells for 20 min at 37°C. Identical program settings (exposure, aperture and pixel binning) were used for all experiments.

### Quantification of Cre recombination efficiency

U2OS cells stably expressing nuclear or cytoplasmic versions of U2OS, or U2OS cells transiently transfected with Cre recombinase were infected at an MOI of 0.05 for 2 days. Virus progeny was then analyzed by U2OS plaque assay for YFP expression of individual virus plaques.

### Fluorescence microscopy

To detect YFP,  $2 \times 10^5$  BGMK cells were seeded on coverslips and infected (or mock infected) with virus at a MOI = 0.01 for two days. The cells were fixed with 2% paraformaldehyde, mounted in 50% glycerol containing 4 mg/mL N-propyl-gallate (Sigma-Aldrich), and 250 µg/mL 4,6-diamidino-2-phenylindole (DAPI) (Invitrogen), and visualized using a Zeiss 710 confocal microscope equipped with Zeiss Zen software 2009, light edition. For immunofluorescence microscopy,  $5 \times 10^4$  Cre-expressing U2OS cells were plated per 1.8 cm<sup>2</sup> well in Nunc Chamber Slides<sup>®</sup>. The cells were washed three times with PBS and fixed with 4% paraformaldehyde for 10 min at room temperature. The cells were treated for 30 min with blocking buffer (0.2% Triton X-100, 5% normal goat serum in PBS) and then incubated overnight at 4°C with a 1:100 diluted anti-Cre antibody in blocking buffer. The cells were washed with PBS, incubated for 30 min with Cy3-conjugated goat anti-rabbit antibody (Jackson), washed three times, and then mounted on a slide. DNA was stained with 1.5 µg/mL 4,6-diamidino-2-phenylindole (DAPI). Cell images were captured using a Zeiss Axioplan 2 microscope equipped with Axioview 3.1 software.

### Virus DNA extraction

DNA was extracted from sucrose cushion purified virus stocks according to methods adapted from Meyer et al. [46]. Briefly, 200 µL of purified virus stock was treated with lysis buffer (1.4 mL

54% sucrose, 15  $\mu$ L 2-mercaptoethanol, 50  $\mu$ L of 20 mg/mL, proteinase-K and 250  $\mu$ L 10% SDS) for 4 hours at 55°C. The samples were then purified by phenol extraction.

### Sequencing of viral DNA

Viral DNA from Cre-passaged viruses was subjected to PCR amplification at the site of Cre recombination. Sequencing was performed using the Applied Biosystem DNA analyzers. The entire genome of both parental VV Western Reserve and recombinant VV- $\Delta$ I4L<sup>DEL</sup> virus post Cre passage were sequenced from 5  $\mu$ g of extracted viral DNA at the Genome Québec Innovation Centre (Montréal, Québec) using a high throughput pyrosequencing approach on a Roche 454 GS FLX Titanium sequencer platform. CLC Genomics Workbench 4.6 software was used to assemble the genome sequence. The viral genomes were analyzed and compared using dotplots prepared using the program Gepard [47] with default settings.

### DNA restriction digest and southern hybridization

Viral DNA was analyzed using Southern blot. Briefly, 7  $\mu$ g of DNA was digested overnight with HindIII restriction enzyme (Invitrogen) at 37°C. DNA digests were electrophoresed on a 0.8% agarose gel in 1  $\times$  TAE buffer at 46 V for 6 hours, then stained with ethidium bromide and photographed. Gels were first denatured for 45 mins, then neutralized for 45 mins prior to transfer over night onto Hybond-N membrane (Amersham), and finally UV cross-linked. A 931 bp *yfp-gpt* probe was labeled with P<sup>32</sup>  $\alpha$ -dCTP (PerkinElmer) using the Multiprime DNA Labeling kit (Amersham). The blot was blocked for 2 hours at 42°C in a formamide pre-hybridization buffer followed by over night hybridization with 5  $\mu$ Curies of denatured probe. Membranes were washed and exposed to a phospho screen for 18 hours and imaged on a Storm imaging system (Storm 860; Molecular Dynamics) using ImageQuant software, version 5.2.

### Western blotting

For immunoblotting, cells were lysed in RIPA buffer with protease inhibitors (Complete<sup>®</sup>, Roche) for 30 min on ice. The cell lysates were sonicated for 30 seconds, centrifuged at 10,000  $\times$ g and the cell pellets discarded, fractionated by electrophoresis on a Nupage 4–12% Bis-Tris gel (Invitrogen), transferred to Hybond-C extra nitrocellulose membranes (Amersham), and probed with the indicated primary antibodies. Secondary antibodies conjugated to horseradish peroxidase or Li-Cor infrared dyes were used to detect bound antigens.

### References

- Fenner F, Henderson D, Arita L, Jezek Z, Ladnyi ID, eds. Smallpox and Its Eradication. Geneva: W.H.O.
- Gilbert PA, McFadden G (2006) Poxvirus cancer therapy. *Recent Pat Antiinfect Drug Discov* 1: 309–321.
- Moroziewicz D, Kaufman HL (2005) Gene therapy with poxvirus vectors. *Curr Opin Mol Ther* 7: 317–325.
- Smith GL, Moss B (1983) Infectious poxvirus vectors have capacity for at least 25 000 base pairs of foreign DNA. *Gene* 25: 21–28.
- Fenner F, Comben BM (1958) [Genetic studies with mammalian poxviruses. I. Demonstration of recombination between two strains of vaccinia virus.]. *Virology* 5: 530–548.
- Nakano E, Panicali D, Paoletti E (1982) Molecular genetics of vaccinia virus: demonstration of marker rescue. *Proc Natl Acad Sci U S A* 79: 1593–1596.
- Mastrangelo MJ, Maguire HC, Jr., Eisenlohr LC, Laughlin CE, Monken CE, et al. (1999) Intratumoral recombinant GM-CSF-encoding virus as gene therapy in patients with cutaneous melanoma. *Cancer Gene Ther* 6: 409–422.
- Erbs P, Findeli A, Kintz J, Cordier P, Hoffmann C, et al. (2008) Modified vaccinia virus Ankara as a vector for suicide gene therapy. *Cancer Gene Ther* 15: 18–28.
- Cadoz M, Strady A, Meignier B, Taylor J, Tartaglia J, et al. (1992) Immunisation with canarypox virus expressing rabies glycoprotein. *Lancet* 339: 1429–1432.
- Kantoff PW, Schuetz TJ, Blumenstein BA, Glode LM, Bilhartz DL, et al. (2010) Overall survival analysis of a phase II randomized controlled trial of a Poxviral-based PSA-targeted immunotherapy in metastatic castration-resistant prostate cancer. *J Clin Oncol* 28: 1099–1105.
- Kanesa-thasan N, Smucny JJ, Hoke CH, Marks DH, Konishi E, et al. (2000) Safety and immunogenicity of NYVAC-JEV and ALVAC-JEV attenuated recombinant Japanese encephalitis virus–poxvirus vaccines in vaccinia-nonimmune and vaccinia-immune humans. *Vaccine* 19: 483–491.
- Bejon P, Ogada E, Mwangi T, Milligan P, Lang T, et al. (2007) Extended follow-up following a phase 2b randomized trial of the candidate malaria vaccines FP9 ME-TRAP and MVA ME-TRAP among children in Kenya. *PLoS One* 2: e707.
- Harrop R, Drury N, Shingler W, Chikoti P, Redchenko I, et al. (2007) Vaccination of colorectal cancer patients with modified vaccinia ankara encoding the tumor antigen 5T4 (TroVax) given alongside chemotherapy induces potent immune responses. *Clin Cancer Res* 13: 4487–4494.
- Dasgupta S, Bhattacharya-Chatterjee M, O'Malley BW, Jr., Chatterjee SK (2006) Recombinant vaccinia virus expressing interleukin-2 invokes anti-tumor

### Statistical Analysis

Data were analyzed by a one-way Anova, followed by a Turkey post-hoc for multiple group comparison at a 99% confidence interval.

### Supporting Information

**Figure S1 Detection of YFP protein expression by western blot analysis.** (A) Western blotting of transfected cells. Anti-YFP western blot of U2OS cells mock transfected (1), or transfected with plasmid DNA pEYFP-c1 (2), pEYFP-gpt, (3), or pEYFP-gpt-1loxP (4). (TIFF)

**Figure S2 Plasmid maps of pDGloxPKO<sup>DEL</sup> and pDGloxPKO<sup>INV</sup>.** (A) Map of cloning vector pDGloxPKO<sup>DEL</sup> and (B) pDGloxPKO<sup>INV</sup> with labeled open reading frames. (TIFF)

**Figure S3 Sequencing analysis of genomic viral DNA from VV- $\Delta$ I4L<sup>DEL</sup>.** (A) Dotplot comparison of sequenced viral genomes of wild type Western Reserve vaccinia virus and recombinant VV- $\Delta$ I4L<sup>DEL</sup> virus post Cre passage using default settings available in Gepard [47]. (TIFF)

**Table S1 Primers used in the study.** (DOC)

### Acknowledgments

Thank you to Mr. Paul Oleynik from the StemCore laboratories for assistance in generating the FACS data. Thank you to Ms. Megan Desaulniers for preparing Western Reserve vaccinia virus, and Ms. Li Qin for preparing genomic viral DNA for sequencing analysis. Thank you to Dr. Christopher Mathews for the anti-VV I4 antibodies. Thank you to Dr. Ian Lorimer for the pHIT60 and pHIT456 plasmids. Thank you to Dr. Klaus Rajewsky for sharing the pMC-Cre plasmid, and Dr. David Bartlett for sharing the pSC65-luc plasmid. Thank you to Dr. John Barrett for his technical expertise. Thank you to Catherine Mathis (Transgene, France) for her expertise and communications regarding Regulatory Guidelines for poxvirus recombinants.

### Author Contributions

Conceived and designed the experiments: JLR JW DBG NJVB KG KJ MB DHE JCB. Performed the experiments: JLR JW DBG NJVB KG. Analyzed the data: JLR JW DBG NJVB KG KJ MB DHE JCB. Contributed reagents/materials/analysis tools: JLR JW DBG NJVB KG KJ MB DHE JCB. Wrote the paper: JLR JW JCB.

- cellular immunity in an orthotopic murine model of head and neck squamous cell carcinoma. *Mol Ther* 13: 183–193.
15. Lorenz MG, Kantor JA, Schlom J, Hodge JW (1999) Anti-tumor immunity elicited by a recombinant vaccinia virus expressing CD70 (CD27L). *Hum Gene Ther* 10: 1095–1103.
  16. Lun X, Alain T, Zemp FJ, Zhou H, Rahman MM, et al. (2010) Myxoma virus virotherapy for glioma in immunocompetent animal models: optimizing administration routes and synergy with rapamycin. *Cancer Res* 70: 598–608.
  17. Evgin L, Vaha-Koskela M, Rintoul J, Falls T, Le Boeuf F, et al. (2010) Potent oncolytic activity of raccoonpox virus in the absence of natural pathogenicity. *Mol Ther* 18: 896–902.
  18. Huygen K, Content J, Denis O, Montgomery DL, Yawman AM, et al. (1996) Immunogenicity and protective efficacy of a tuberculosis DNA vaccine. *Nat Med* 2: 893–898.
  19. Kim JH, Oh JY, Park BH, Lee DE, Kim JS, et al. (2006) Systemic armed oncolytic and immunologic therapy for cancer with JX-594, a targeted poxvirus expressing GM-CSF. *Mol Ther* 14: 361–370.
  20. McCart JA, Ward JM, Lee J, Hu Y, Alexander HR, et al. (2001) Systemic cancer therapy with a tumor-selective vaccinia virus mutant lacking thymidine kinase and vaccinia growth factor genes. *Cancer Res* 61: 8751–8757.
  21. Mackett M, Smith GL, Moss B (1984) General method for production and selection of infectious vaccinia virus recombinants expressing foreign genes. *J Virol* 49: 857–864.
  22. Piccini A, Perkus ME, Paoletti E (1987) Vaccinia virus as an expression vector. *Methods Enzymol* 153: 545–563.
  23. Gammon DB, Gowrishankar B, Duraffour S, Andrei G, Upton C, et al. (2010) Vaccinia virus-encoded ribonucleotide reductase subunits are differentially required for replication and pathogenesis. *PLoS Pathog* 6: e1000984.
  24. Franke CA, Rice CM, Strauss JH, Hruba DE (1985) Neomycin resistance as a dominant selectable marker for selection and isolation of vaccinia virus recombinants. *Mol Cell Biol* 5: 1918–1924.
  25. Falkner FG, Moss B (1988) *Escherichia coli* gpt gene provides dominant selection for vaccinia virus open reading frame expression vectors. *J Virol* 62: 1849–1854.
  26. Chakrabarti S, Brechling K, Moss B (1985) Vaccinia virus expression vector: coexpression of beta-galactosidase provides visual screening of recombinant virus plaques. *Mol Cell Biol* 5: 3403–3409.
  27. Carroll MW, Moss B (1995) *E. coli* beta-glucuronidase (GUS) as a marker for recombinant vaccinia viruses. *Biotechniques* 19: 352–354, 356.
  28. Luker KE, Hutchens M, Schultz T, Pekosz A, Luker GD (2005) Bioluminescence imaging of vaccinia virus: effects of interferon on viral replication and spread. *Virology* 341: 284–300.
  29. Committee for the Proprietary Medicinal Products (CPMP). Note for guidance on the quality, preclinical and clinical aspects of gene transfer medicinal products, *The European Agency for the Evaluation of Medicinal Products*, (London, 2001). EMA website. Available: [http://www.ema.europa.eu/docs/en\\_GB/document\\_library/Scientific\\_guideline/2009/10/WC500003987.pdf](http://www.ema.europa.eu/docs/en_GB/document_library/Scientific_guideline/2009/10/WC500003987.pdf). Accessed 2011 Aug 18.
  30. Demmin GL, Clase AC, Randall JA, Enquist LW, Banfield BW (2001) Insertions in the gG gene of pseudorabies virus reduce expression of the upstream Us3 protein and inhibit cell-to-cell spread of virus infection. *J Virol* 75: 10856–10869.
  31. Falkner FG, Moss B (1990) Transient dominant selection of recombinant vaccinia viruses. *J Virol* 64: 3108–3111.
  32. Scheifflinger F, Dorner F, Falkner FG (1998) Transient marker stabilisation: a general procedure to construct marker-free recombinant vaccinia virus. *Arch Virol* 143: 467–474.
  33. Alejo A, Saraiva M, Ruiz-Arguello MB, Viejo-Borbolla A, de Marco MF, et al. (2009) A method for the generation of ectromelia virus (ECTV) recombinants: in vivo analysis of ECTV vCD30 deletion mutants. *PLoS One* 4: e5175.
  34. Gammon DB, Evans DH (2009) The 3'-to-5' exonuclease activity of vaccinia virus DNA polymerase is essential and plays a role in promoting virus genetic recombination. *J Virol* 83: 4236–4250.
  35. Sauer B, Henderson N (1988) Site-specific DNA recombination in mammalian cells by the Cre recombinase of bacteriophage P1. *Proc Natl Acad Sci U S A* 85: 5166–5170.
  36. Sternberg N, Hamilton D (1981) Bacteriophage P1 site-specific recombination. I. Recombination between loxP sites. *J Mol Biol* 150: 467–486.
  37. Xiang H, Wang J, Boxer LM (2006) Role of the cyclic AMP response element in the bcl-2 promoter in the regulation of endogenous Bcl-2 expression and apoptosis in murine B cells. *Mol Cell Biol* 26: 8599–8606.
  38. Shor B, Cavender D, Harris C (2009) A kinase-dead knock-in mutation in mTOR leads to early embryonic lethality and is dispensable for the immune system in heterozygous mice. *BMC Immunol* 10: 28.
  39. Shearwin KE, Callen BP, Egan JB (2005) Transcriptional interference—a crash course. *Trends Genet* 21: 339–345.
  40. Isaacs SN, Kotwal GJ, Moss B (1990) Reverse guanine phosphoribosyltransferase selection of recombinant vaccinia viruses. *Virology* 178: 626–630.
  41. Lin YC, Li J, Irwin CR, Jenkins H, DeLange L, et al. (2008) Vaccinia virus DNA ligase recruits cellular topoisomerase II to sites of viral replication and assembly. *J Virol* 82: 5922–5932.
  42. Gu H, Zou YR, Rajewsky K (1993) Independent control of immunoglobulin switch recombination at individual switch regions evidenced through Cre-loxP-mediated gene targeting. *Cell* 73: 1155–1164.
  43. Chakrabarti S, Sisler JR, Moss B (1997) Compact, synthetic, vaccinia virus early/late promoter for protein expression. *Biotechniques* 23: 1094–1097.
  44. Zhu B, Cai G, Hall EO, Freeman GJ (2007) In-fusion assembly: seamless engineering of multidomain fusion proteins, modular vectors, and mutations. *Biotechniques* 43: 354–359.
  45. Soneoka Y, Cannon PM, Ramsdale EE, Griffiths JC, Romano G, et al. (1995) A transient three-plasmid expression system for the production of high titer retroviral vectors. *Nucleic Acids Res* 23: 628–633.
  46. Meyer H, Damon IK, Esposito JJ (2004) Orthopoxvirus diagnostics. *Methods Mol Biol* 269: 119–134.
  47. Krumsiek J, Arnold R, Rattei T (2007) Gepard: a rapid and sensitive tool for creating dotplots on genome scale. *Bioinformatics* 23: 1026–1028.
